# Supplementary material
Source: Springer Nature journal article supplement (https://www.springermedizin.de/resource/supplementary/12936_2007_412_MOESM8_ESM.pdf/9547390)

**(a) Rabbit anti-Pfs25**

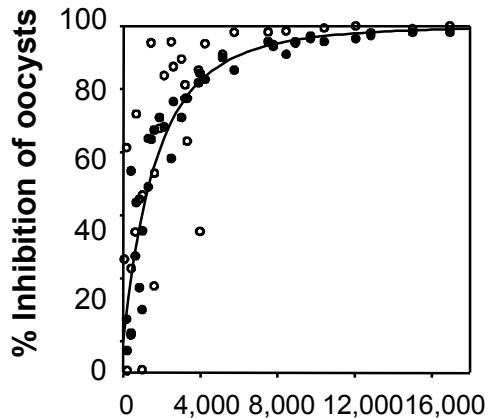

**Anti-Pfs25 antibody units**

**(b) Rhesus anti-Pvs25**

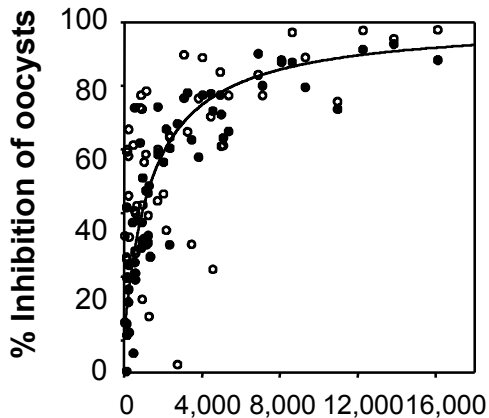

**Anti-Pvs25 antibody units**

Supplement: MOESM8 [file 9547390]
